# Supplementary material for: Significantly improving the efficiency of polymer solar cells through incorporating noncovalent conformational locks
Source: Royal Society of Chemistry journal article supplement (doi:10.1039/c6qm00296j), 2017-01-01
Supplement: c6qm00296j1.pdf [file c6qm00296j1.pdf]

## Significantly Improving the Efficiency of Polymer Solar Cells through Incorporating Noncovalent Conformational Locks

Lei Lv,<sup>a, ‡</sup> Xiaofen Wang,<sup>a,b, ‡</sup> Tao Dong,<sup>a</sup> Xinlong Wang,<sup>a</sup> Xiaoxi Wu,<sup>a</sup> Lei Yang,<sup>a</sup> and Hui Huang<sup>\*, a</sup>

<sup>a</sup> College of Materials Science and Opto-Electronic Technology&CAS Key Laboratory of Vacuum Physic, University of Chinese Academy of Sciences, Beijing 100049, P. R. China

<sup>b</sup> Beijing Key Laboratory of Function Materials for Molecular&Structure Construction, School of Materials Science and Engineering, University of Science and Technology Beijing, Beijing, 100083, P. R. China

<sup>‡</sup> These authors contributed equally to this work.

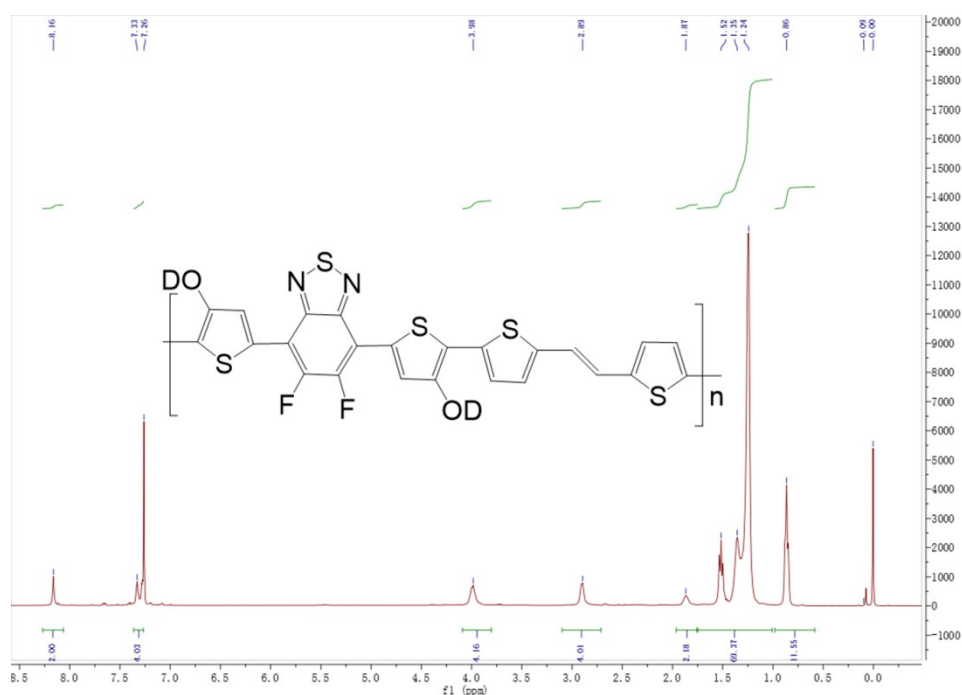

Fig. S1. <sup>1</sup>H NMR spectrum of PDTffBT-TVT at 298K.

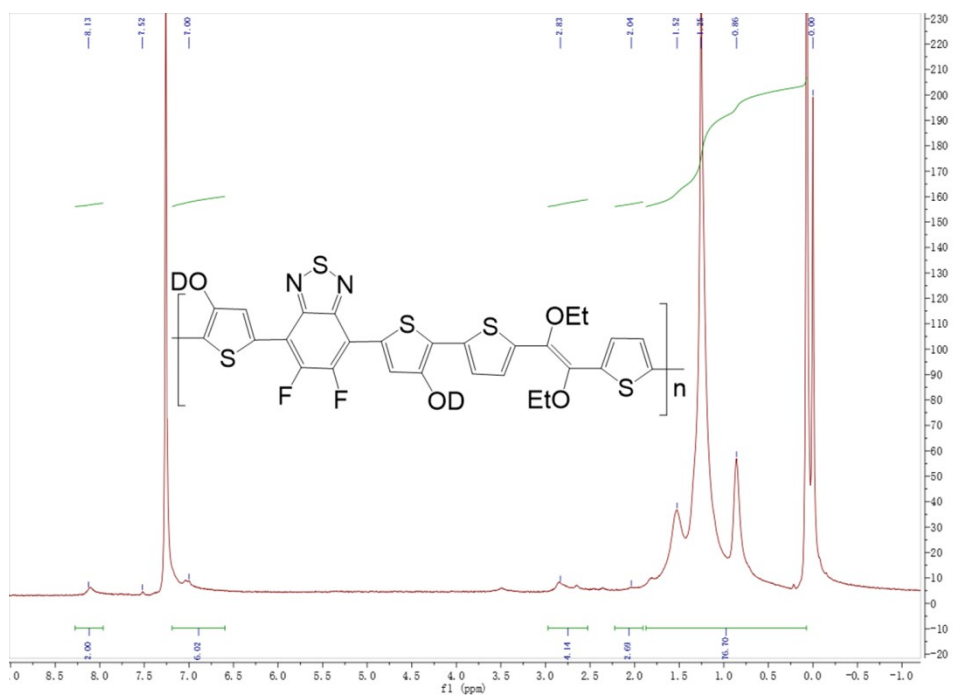

Fig. S2.  $^1\text{H}$  NMR spectrum of PDTffBT-TVTOEt at 298K.

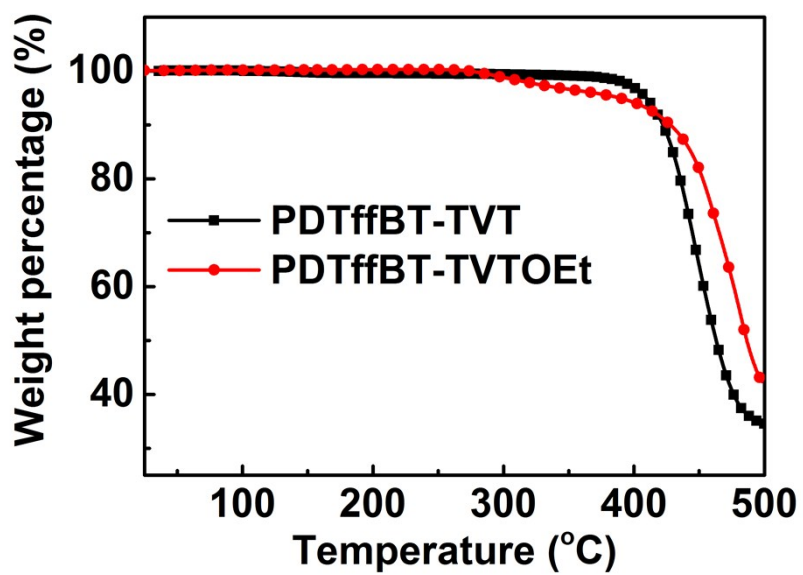

Fig. S3. TGA thermograms of polymers under nitrogen.

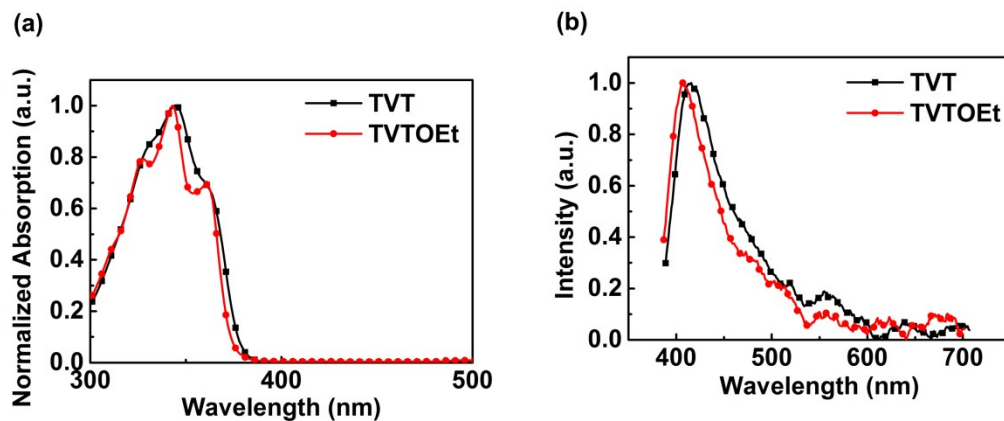

Fig. S4. UV-vis (a) and photoluminescence (b) spectra of the solution of TVT and TVTOEt.

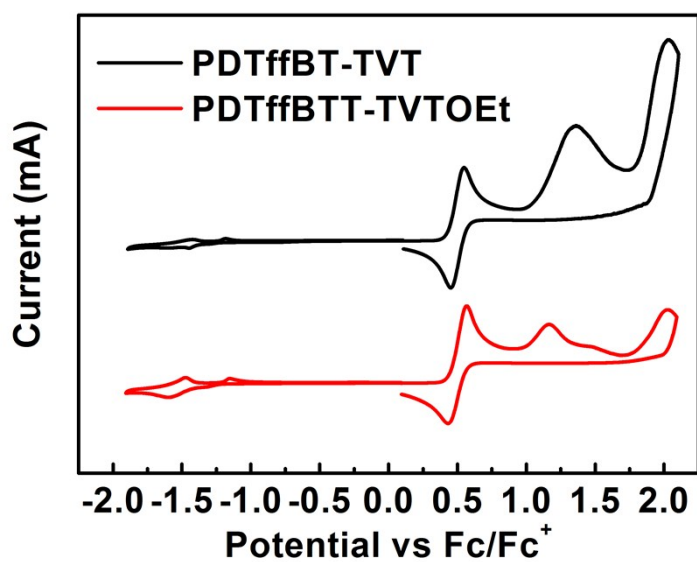

Fig. S5. Cyclic voltammograms of polymers' films on Glassy Carbon electrode in 0.1 M  $\text{Bu}_4\text{NPF}_6$  solution in acetonitrile with a scan rate of 50 mV/s.

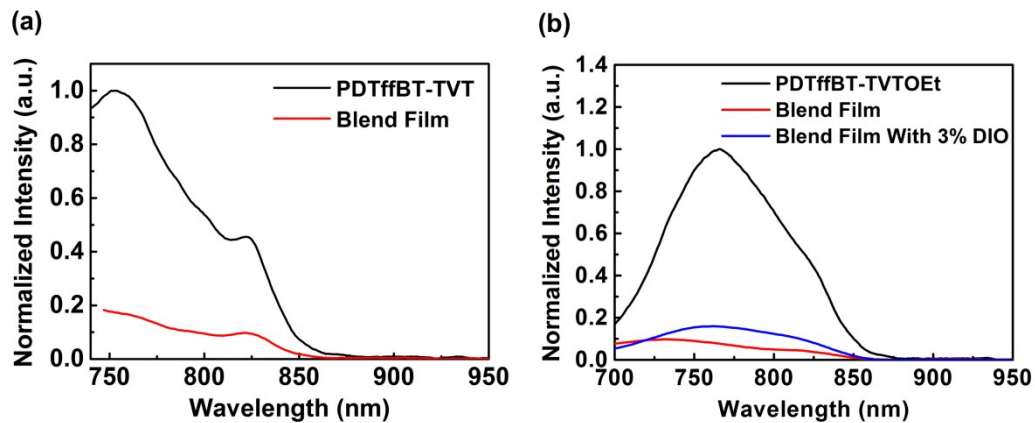

Fig. S6. Photoluminescence of polymers: PC<sub>71</sub>BM blend films

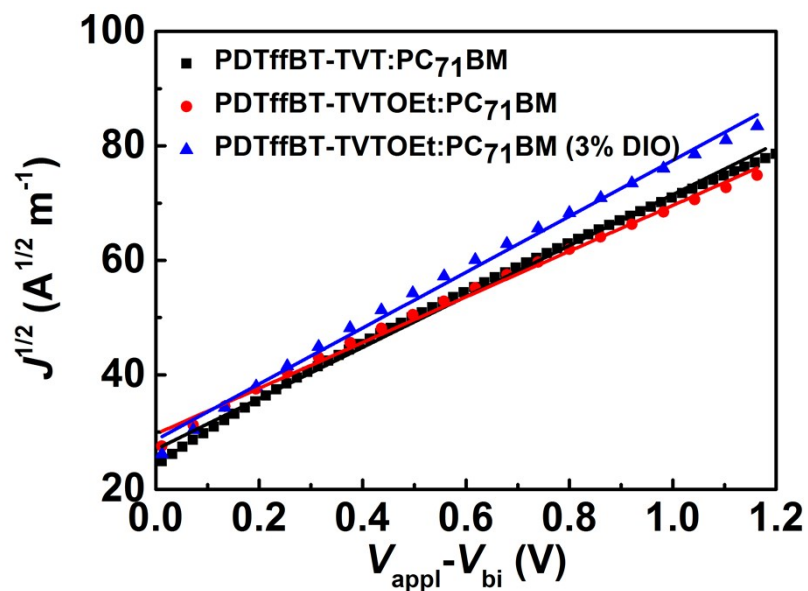

Fig. S7.  $J^{1/2}$ - $V$  plots for hole-only devices based on polymer:PC<sub>71</sub>BM.

Table S1 Summary of absorption and emission characteristics of the solution of TVT and TVTOEt

|        | $\lambda_{em}$<br>[nm] | $\lambda_{abs}$<br>[nm] | $\Delta\lambda$<br>[nm] |
|--------|------------------------|-------------------------|-------------------------|
| TVT    | 416                    | 345                     | 71                      |
| TVTOEt | 402                    | 343                     | 59                      |
